# Supplementary material for: A Framework of Construct-Irrelevant Variance for Contextualized Constructed Response Assessment
Source: Frontiers journal article supplement (doi:10.3389/feduc.2021.751283), 2021-10-12
Supplement: Table_1.docx [file Table_1.docx]

*Supplementary Material*

*Table S1* Examples of constructed responses and the scores (Zhai et al., 2020)

| Scenario Introduction | Score | Analyzing Student Thinking | Analyzing Responsive teaching |
| --- | --- | --- | --- |
| S1. This 4th-grade class is learning about how airplanes fly. In the first part of this lesson, they discuss the concept of "drag" and what it means. Please view the video and respond in complete sentences to the two questions below the video. | 0 | The students do not have a great understanding of the concepts. All of the students are not actively involved in formulating explanations. Students do not seem very confident in their ideas as they are related to the science content. | The teacher does not acknowledge when students' ideas/understandings are accurate or good examples. Many great examples were given, but not much positive feedback. The focus was sometimes more on certain words/meaning rather than the student's s ability to use the word correctly. |
| 1 | The students seem to have an idea about what drag is, but are having trouble really explaining what it is or how it works in real-world situations. They are able to come up with related examples that involve drag and are connecting it to the idea of resistance, but it is hard to tell if they understand the forces operating that create a drag situation. | I notice the teacher pushing students to think about drag more broadly. She helps to connect examples students give to other ideas already shared. She pushes students to explain their ideas more fully (ie: what does resistance mean?) She then discusses resistance by bringing in an experience that most students have had and uses that to help students think about resistance. |
| S2. In this 5th grade class, students are trying to explain different scenarios that were provided to their groups (e.g., condensation on the outside of a cold soda can). The teacher instructs the groups to explain their respective scenarios in terms of evaporation, condensation, and water molecules. Please view the video and respond in complete sentences to the two questions below the video. | 0 | Students have different ideas and are connecting to background knowledge and experiences from their lives. Some ideas are closer than others. Students do start to clarify their thinking as they continue. | Yikes! I tried to follow the teacher in this lesson about condensation, but she left many ideas open for the students to translate themselves. |
| 1 | The students have a variety of ideas related to water molecules and how condensation occurs. The students also make interesting connections to other similar ideas like that of a person sweating. However, some of the student ideas are incomplete or not completely correct. | The teacher continues to ask students questions to push them towards the idea that it is when the water vapor cools next to the can, the water condenses forming droplets. She tries first to get students to think about where and when the air will cool down. She often tells her students they are on the right track and then asks additional questions to try to correct misconceptions. |
| S3. This 5th-grade class is on the fifth of six lessons in a unit on the water cycle. Working in groups, students have completed an investigation using a distillation apparatus to follow the evaporation and condensation of water. The groups are working together to explain the observations they made in this investigation. | 0 | Students seem to have a high degree of comfort talking about the science content in the video. They are able to explain and respond to teacher questions using the diagram. | The teacher asks students to explain using their diagrams. The teacher asks students to explain using their experience/ observations from doing the experiment. The teacher asks them to explain their ideas using a molecular view. |
| 1 | The students did a great job of using the experience of the lab as well as the diagram to help explain their thinking. They still struggled to get to the point of how the molecules were moving (slowing down and getting closer together.) | The teacher asks students to explain using their diagrams. The teacher asks students to explain using their experience/ observations from doing the experiment. The teacher asks them to explain their ideas using a molecular view. |
